# Supplementary material for: Identification of Novel Reference Genes Based on MeSH Categories
Source: PubMed Central journal article supplement (PMC3969360; doi:10.1371/journal.pone.0093341), 2014-03-28
Supplement: pone.0093341.s002.pdf [file pone.0093341.s002.pdf]

## Supporting Information

**Table S1** Kolmogorov–Simirnov Test results for the hypothesis comparing pair-wise equivalence of the ratio distribution of housekeeping gene set to the ratio distribution of random sets of genes excluding the housekeeping genes. Random sets of genes had the same mean rank distribution as of housekeeping genes.

a)

| House Keeping Gene Set vs. Random Sets* | CV ≤ 0.5 |         | CV ≤ 0.1 |         | CV ≤ 0.05 |         | CV ≤ 0.01 |         |
|-----------------------------------------|----------|---------|----------|---------|-----------|---------|-----------|---------|
|                                         | D        | p-value | D        | p-value | D         | p-value | D         | p-value |
| Set 1                                   | 0.443    | <0.0001 | 0.505    | <0.0001 | 0.511     | <0.0001 | 0.458     | <0.0001 |
| Set 2                                   | 0.454    | <0.0001 | 0.484    | <0.0001 | 0.493     | <0.0001 | 0.463     | <0.0001 |
| Set 3                                   | 0.390    | <0.0001 | 0.452    | <0.0001 | 0.436     | <0.0001 | 0.417     | <0.0001 |
| Set 4                                   | 0.417    | <0.0001 | 0.481    | <0.0001 | 0.479     | <0.0001 | 0.424     | <0.0001 |
| Set 5                                   | 0.431    | <0.0001 | 0.461    | <0.0001 | 0.465     | <0.0001 | 0.429     | <0.0001 |

\*Genes were observed at least 50% of the 381 GEO datasets (PO ≥ 50%).

b)

| House Keeping Gene Set vs. Random Sets <sup>§</sup> | PO ≥ 75% |         | PO ≥ 50% |         | PO ≥ 25% |         | PO ≥ 5% |         |
|-----------------------------------------------------|----------|---------|----------|---------|----------|---------|---------|---------|
|                                                     | D        | p-value | D        | p-value | D        | p-value | D       | p-value |
| Set 1                                               | 0.385    | <0.0001 | 0.511    | <0.0001 | 0.587    | <0.0001 | 0.555   | <0.0001 |
| Set 2                                               | 0.367    | <0.0001 | 0.493    | <0.0001 | 0.576    | <0.0001 | 0.511   | <0.0001 |
| Set 3                                               | 0.352    | <0.0001 | 0.436    | <0.0001 | 0.518    | <0.0001 | 0.500   | <0.0001 |
| Set 4                                               | 0.362    | <0.0001 | 0.479    | <0.0001 | 0.564    | <0.0001 | 0.519   | <0.0001 |
| Set 5                                               | 0.348    | <0.0001 | 0.465    | <0.0001 | 0.544    | <0.0001 | 0.512   | <0.0001 |

<sup>§</sup>Genes had CV ≤ 0.05

Hypothesis:

H<sub>0</sub>: The ratio distribution of housekeeping gene set and random set is not significantly different

H<sub>a</sub>: The ratio distributions of the two samples are significantly different.

The bold font results in the table rejected the null hypothesis, H<sub>0</sub>, as the computed p-values were lower than the significance level (p=0.05) in these cases.

**Table S2** Kolmogorov–Simirnov Test results for the hypothesis comparing pair-wise equivalence of the ratio distribution of random sets of genes, excluding the housekeeping genes. Random sets of genes have the same mean rank distribution as of housekeeping genes.

a)

| Random Set vs. Random Sets* | CV ≤ 0.5     |              | CV ≤ 0.1     |              | CV ≤ 0.05    |              | CV ≤ 0.01 |         |
|-----------------------------|--------------|--------------|--------------|--------------|--------------|--------------|-----------|---------|
|                             | D            | p-value      | D            | p-value      | D            | p-value      | D         | p-value |
| Set 1 vs. Set 2             | 0.049        | 0.357        | 0.034        | 0.769        | 0.041        | 0.571        | 0.030     | 0.761   |
| Set 2 vs. Set 3             | <b>0.127</b> | <b>0.000</b> | <b>0.104</b> | <b>0.003</b> | <b>0.102</b> | <b>0.004</b> | 0.055     | 0.197   |
| Set 3 vs. Set 4             | 0.088        | 0.019        | 0.071        | 0.091        | 0.074        | 0.067        | 0.025     | 0.919   |
| Set 4 vs. Set 5             | 0.034        | 0.779        | 0.037        | 0.681        | 0.051        | 0.329        | 0.032     | 0.726   |

\*Genes were observed at least 50% of the total sets (PO ≥ 50%).

b)

| Random Set vs. Random Sets <sup>§</sup> | PO ≥ 75% |         | PO ≥ 50% |              | PO ≥ 25% |              | PO ≥ 5% |              |
|-----------------------------------------|----------|---------|----------|--------------|----------|--------------|---------|--------------|
|                                         | D        | p-value | D        | p-value      | D        | p-value      | D       | p-value      |
| Set 1 vs. Set 2                         | 0.042    | 0.243   | 0.041    | 0.571        | 0.042    | 0.606        | 0.083   | <b>0.039</b> |
| Set 2 vs. Set 3                         | 0.172    | 0.172   | 0.102    | <b>0.004</b> | 0.005    | <b>0.005</b> | 0.053   | <b>0.039</b> |
| Set 3 vs. Set 4                         | 0.076    | 0.076   | 0.074    | 0.067        | 0.022    | <b>0.022</b> | 0.057   | 0.319        |
| Set 4 vs. Set 5                         | 0.032    | 0.529   | 0.051    | 0.329        | 0.352    | 0.352        | 0.053   | 0.393        |

<sup>§</sup>Genes had CV ≤ 0.05 to the number of sets the gene is observed.

Hypothesis:

H<sub>0</sub>: The ratio distributions of random sets are not significantly different

H<sub>a</sub>: The ratio distributions of the two sets are significantly different.

The bold font results in the table rejected the null hypothesis, H<sub>0</sub>, as the computed p-values were lower than the significance level (p=0.05) in these cases.

**Table S3** Stability values of 17 reference genes calculated by NormFinder and geNorm.

| Gene         | NormFinder |       |        |       | geNorm |       |        |       |
|--------------|------------|-------|--------|-------|--------|-------|--------|-------|
|              | All        | Liver | Breast | Colon | All    | Liver | Breast | Colon |
| <b>RPS10</b> | 0.25       | 0.19  | 0.42   | 0.12  | 0.00   | 0.00  | 0.00   | 0.00  |
| <b>RPL41</b> | 0.26       | 0.29  | 0.29   | 0.11  | 0.00   | 0.00  | 0.00   | 0.00  |
| <b>RPL7</b>  | 0.26       | 0.19  | 0.29   | 0.20  | 0.27   | 0.22  | 0.25   | 0.28  |
| <b>RPS3A</b> | 0.23       | 0.23  | 0.11   | 0.07  | 0.34   | 0.30  | 0.38   | 0.13  |
| <b>RPL30</b> | 0.21       | 0.11  | 0.26   | 0.22  | 0.37   | 0.31  | 0.31   | 0.25  |
| <b>HBXIP</b> | 0.34       | 0.29  | 0.33   | 0.29  | 0.44   | 0.45  | 0.17   | 0.20  |
| <b>CFL1</b>  | 0.30       | 0.29  | 0.18   | 0.35  | 0.47   | 0.42  | 0.35   | 0.46  |
| <b>RPS17</b> | 0.39       | 0.19  | 0.49   | 0.38  | 0.51   | 0.27  | 0.50   | 0.31  |
| <b>EEF2</b>  | 0.43       | 0.38  | 0.30   | 0.70  | 0.55   | 0.53  | 0.43   | 0.65  |
| <b>ACTB</b>  | 0.48       | 0.43  | 0.24   | 0.32  | 0.60   | 0.50  | 0.47   | 0.41  |
| <b>GAPDH</b> | 0.39       | 0.25  | 0.62   | 0.39  | 0.64   | 0.38  | 0.78   | 0.52  |
| <b>H2AFZ</b> | 0.49       | 0.33  | 0.64   | 0.25  | 0.68   | 0.48  | 0.82   | 0.17  |
| <b>AARS</b>  | 0.60       | 0.60  | 0.73   | 0.28  | 0.72   | 0.58  | 0.66   | 0.49  |
| <b>TPT1</b>  | 0.63       | 0.72  | 0.47   | 0.38  | 0.76   | 0.72  | 0.55   | 0.35  |
| <b>SOD1</b>  | 0.63       | 0.75  | 0.62   | 0.47  | 0.80   | 0.65  | 0.72   | 0.59  |
| <b>RPN2</b>  | 0.73       | 0.78  | 0.29   | 0.51  | 0.85   | 0.79  | 0.59   | 0.56  |
| <b>GSTO1</b> | 1.02       | 1.17  | 1.16   | 0.43  | 0.94   | 0.91  | 0.93   | 0.38  |

**Table S4** Stability values of 13 genes, with standard deviation lower than 1.42, calculated by NormFinder and geNorm.

|              | NormFinder |       |        |       | geNorm |       |        |       |
|--------------|------------|-------|--------|-------|--------|-------|--------|-------|
|              | All        | Liver | Breast | Colon | All    | Liver | Breast | Colon |
| <b>RPL30</b> | 0.22       | 0.19  | 0.23   | 0.19  | 0.37   | 0.31  | 0.31   | 0.25  |
| <b>RPS3A</b> | 0.23       | 0.31  | 0.04   | 0.07  | 0.34   | 0.30  | 0.38   | 0.13  |
| <b>RPL7</b>  | 0.25       | 0.22  | 0.31   | 0.19  | 0.27   | 0.22  | 0.25   | 0.28  |
| <b>RPS10</b> | 0.25       | 0.21  | 0.41   | 0.09  | 0.00   | 0.00  | 0.00   | 0.00  |
| <b>RPL41</b> | 0.28       | 0.37  | 0.22   | 0.12  | 0.00   | 0.00  | 0.00   | 0.00  |
| <b>CFL1</b>  | 0.30       | 0.22  | 0.24   | 0.39  | 0.47   | 0.42  | 0.35   | 0.46  |
| <b>HBXIP</b> | 0.31       | 0.25  | 0.31   | 0.24  | 0.44   | 0.45  | 0.17   | 0.20  |
| <b>RPS17</b> | 0.41       | 0.26  | 0.52   | 0.34  | 0.51   | 0.27  | 0.50   | 0.31  |
| <b>GAPDH</b> | 0.43       | 0.21  | 0.68   | 0.45  | 0.64   | 0.38  | 0.78   | 0.52  |
| <b>ACTB</b>  | 0.48       | 0.36  | 0.28   | 0.32  | 0.60   | 0.50  | 0.47   | 0.41  |
| <b>H2AFZ</b> | 0.52       | 0.32  | 0.68   | 0.19  | 0.67   | 0.48  | 0.82   | 0.17  |
| <b>AARS</b>  | 0.57       | 0.57  | 0.66   | 0.35  | 0.72   | 0.58  | 0.66   | 0.49  |
| <b>SOD1</b>  | 0.63       | 0.73  | 0.59   | 0.50  | 0.80   | 0.65  | 0.72   | 0.56  |

**Table S5** Real-time quantitative PCR primers

| <b>Gene</b> | <b>Primer</b> | <b>Oligo sequence (5'→3')</b> | <b>Amplicon size (bp)</b> |
|-------------|---------------|-------------------------------|---------------------------|
| AARS        | sense         | CCAGTGGCAGAAGGATGAAT          | 206                       |
|             | antisense     | GCTTCAAGGCTTCATTCAGG          |                           |
| ACTB        | sense         | GGACTTCGAGCAAGAGATGG          | 234                       |
|             | antisense     | AGCACTGTGTTGGCGTACAG          |                           |
| CFL1        | sense         | GTGCTCTTCTGCCTGAGTGA          | 247                       |
|             | antisense     | TCTTCTTGATGGCGTCCTTG          |                           |
| EEF2        | sense         | AACGGCAAGTTCAGCAAGTC          | 182                       |
|             | antisense     | TTGTCCTTGTCCTCGCTGTC          |                           |
| GAPDH       | sense         | GGCTGAGAACGGGAAGCTTGTCAT      | 272                       |
|             | antisense     | CAGCCTTCTCCATGGTGGTGAAGA      |                           |
| GSTO1       | sense         | TCGATCCGCATCTACAGCAT          | 271                       |
|             | antisense     | TTCCAGAACTGGCACCAGAC          |                           |
| H2AFZ       | sense         | GTGCGACGAAGGAGTAGGTG          | 176                       |
|             | antisense     | CTCTGCGGTGAGGTACTCCA          |                           |
| HBXIP       | sense         | GCAGCACTTGGAAGACACAA          | 294                       |
|             | antisense     | TCCTATGACAGGCTGCTGAA          |                           |
| RPL30       | sense         | CCTAAGGCAGGAAGATGGTG          | 171                       |
|             | antisense     | GGCAGTTGTTAGCGAGAATG          |                           |
| RPL41       | sense         | AAGATGAGGCAGAGGTCCAA          | 248                       |
|             | antisense     | TCCAGAATGTCACAGGTCCA          |                           |
| RPL7        | sense         | AAGGTGTTGCAGCTTCTTCG          | 164                       |
|             | antisense     | TTGCCATAACCACGCTTGTA          |                           |
| RPN2        | sense         | GCTCTCGATAATCGCTACC           | 289                       |
|             | antisense     | CCGGTTGTCACCTTCAACTT          |                           |
| RPS10       | sense         | CGCAGAGATGTTGATGCCTA          | 162                       |
|             | antisense     | AGAGACTGCATGGCCTTCAT          |                           |
| RPS17       | sense         | CAACGACTTCCACACGAACA          | 210                       |
|             | antisense     | ATCTCCTGATCCAAGGCTGA          |                           |
| RPS3A       | sense         | CCGATGGTTACTTGCTTCGT          | 193                       |
|             | antisense     | CCAATGCTGTCTGGAATCAAT         |                           |
| SOD1        | sense         | AGGCTGTACCAGTGCAGGTC          | 193                       |
|             | antisense     | ATGATGCAATGGTCTCCTGA          |                           |
| TPT1        | sense         | ATGAATCCAGATGGCATGGT          | 167                       |
|             | antisense     | TGTGGATGACAAGCAGAAGC          |                           |
